# Supplementary figures and images for: Endogenous Pancreatic Cancer Cell PD-1 Activates MET and Induces Epithelial-Mesenchymal Transition to Promote Cancer Progression
Source: MDPI journal article supplement (doi:10.3390/cancers14133051), 2022-06-21

**Fig. 1A**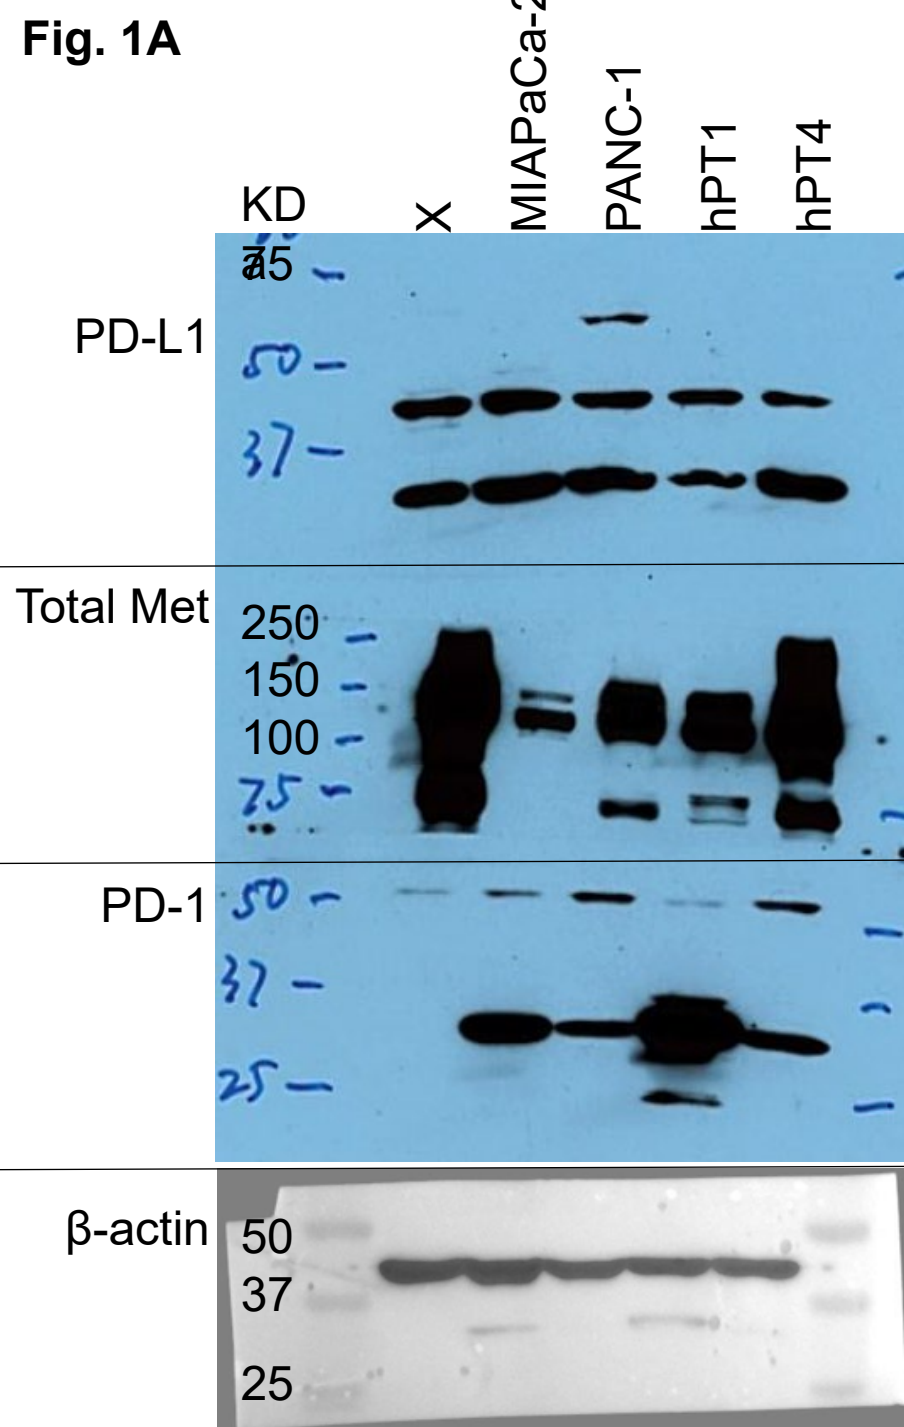**Fig. 1B**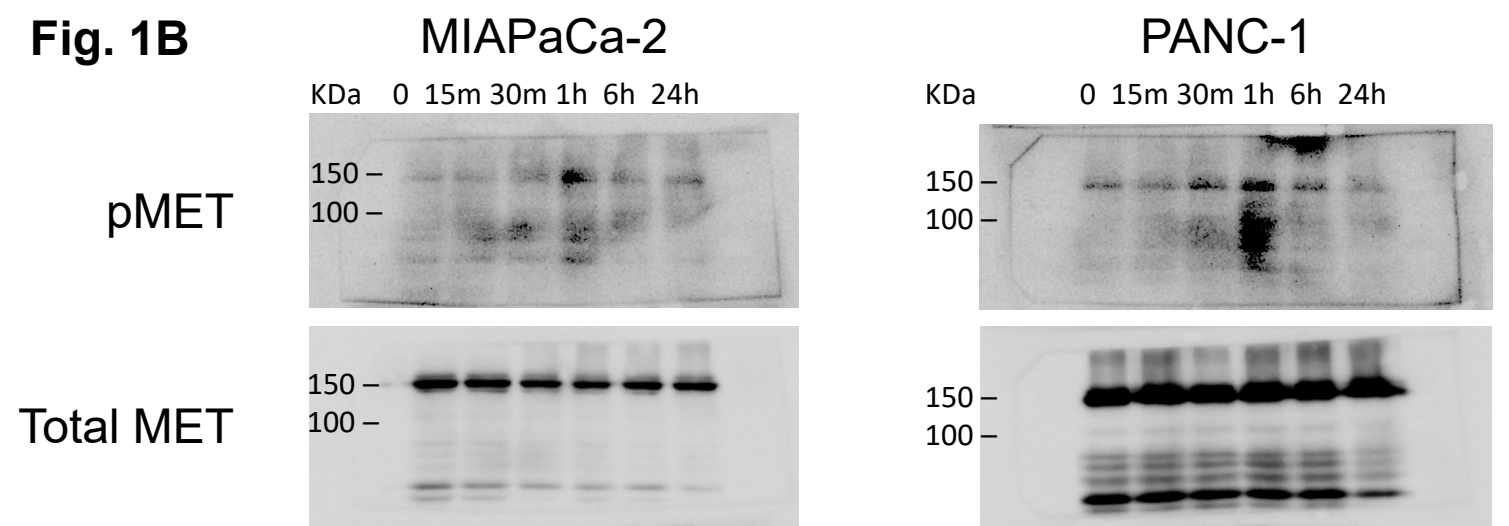**Fig. 1C**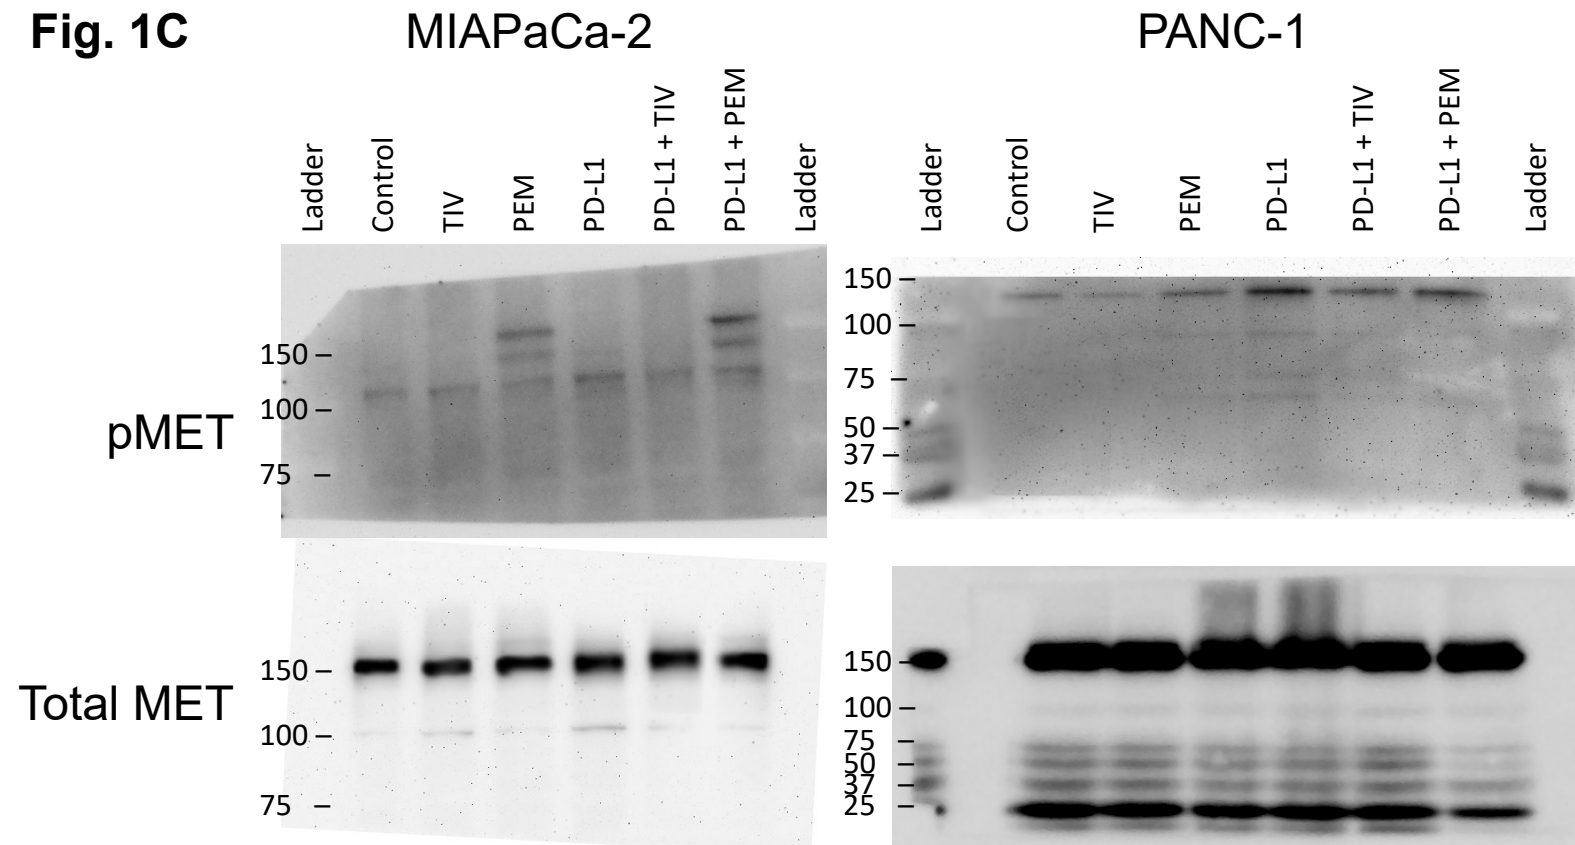

**Fig. 3A**

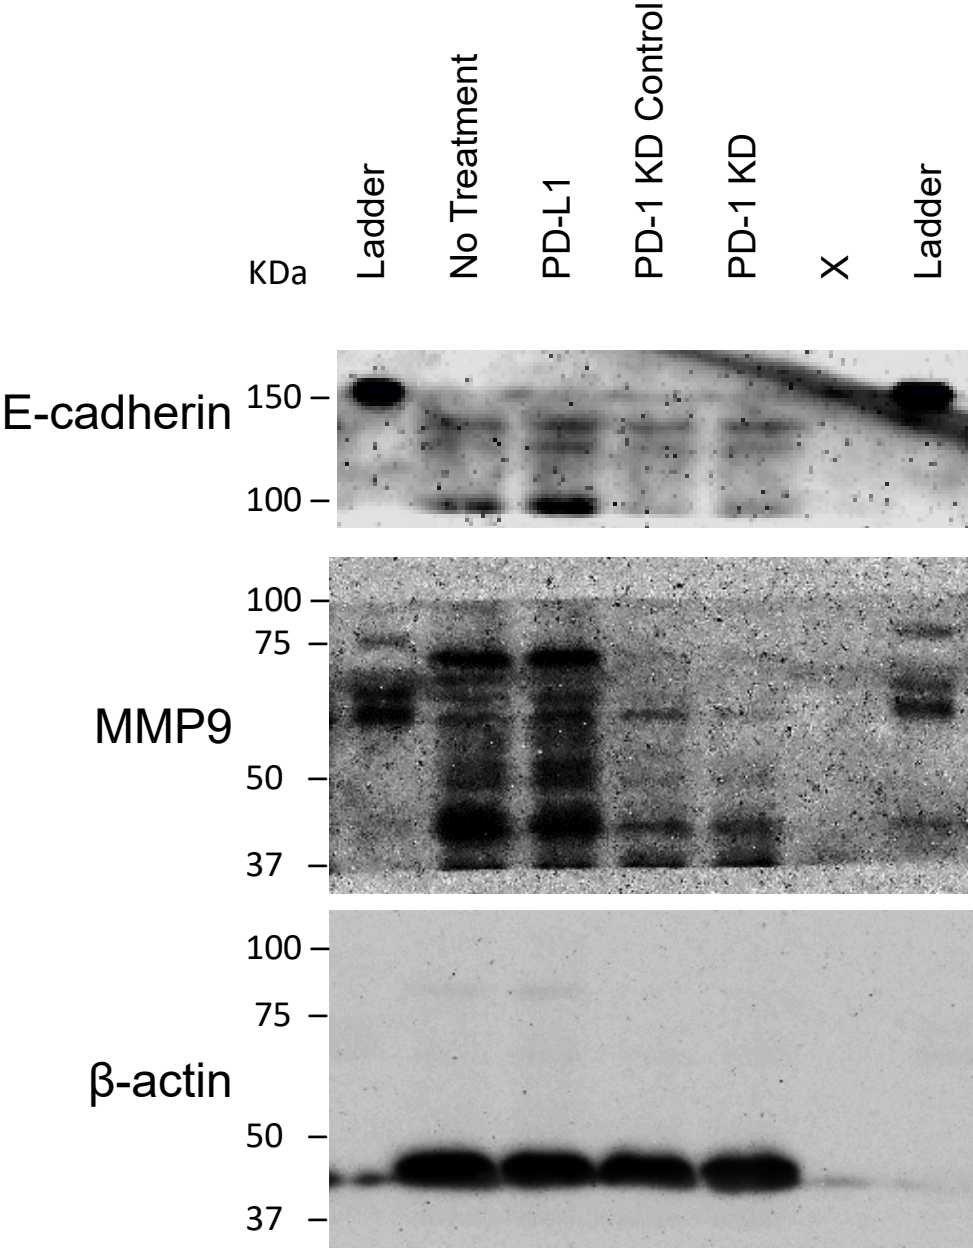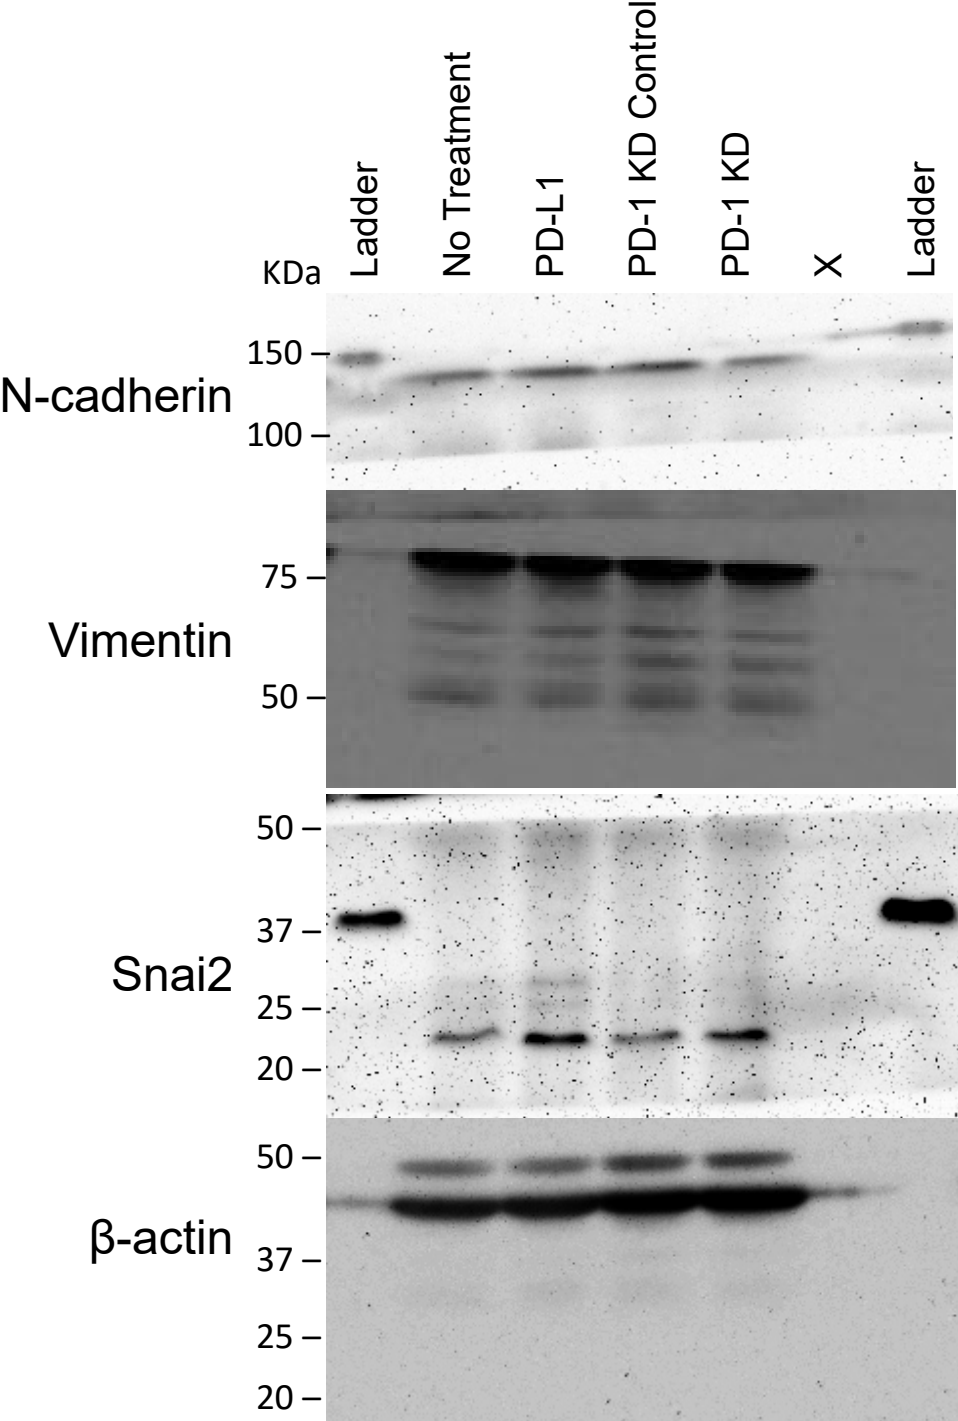

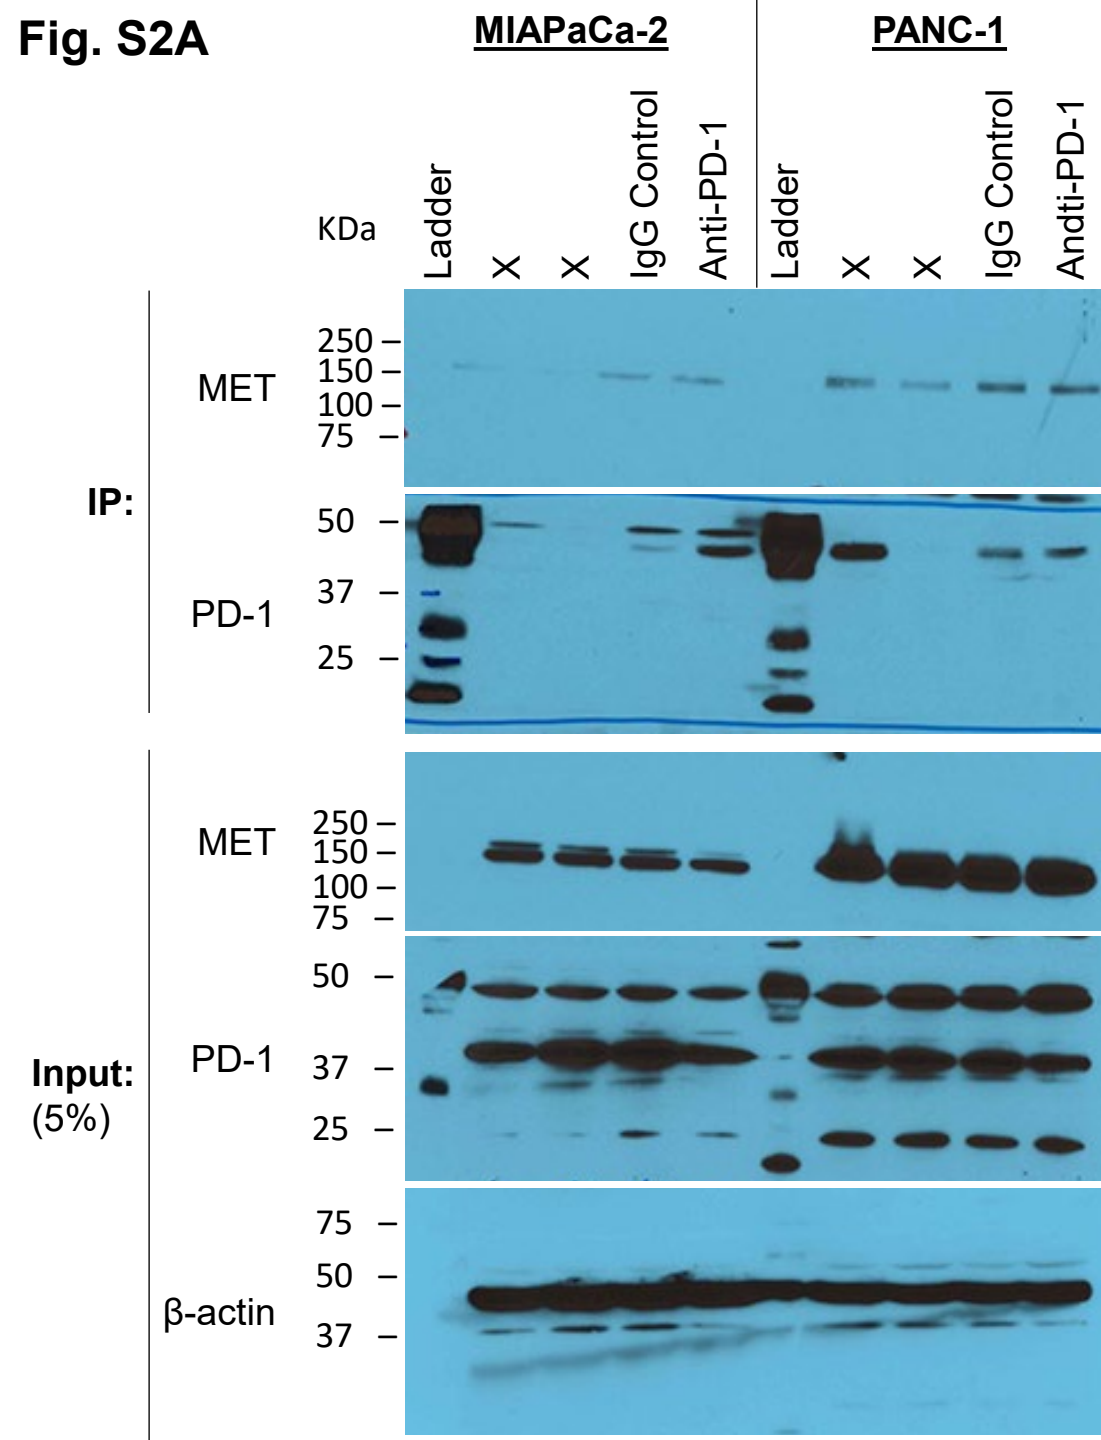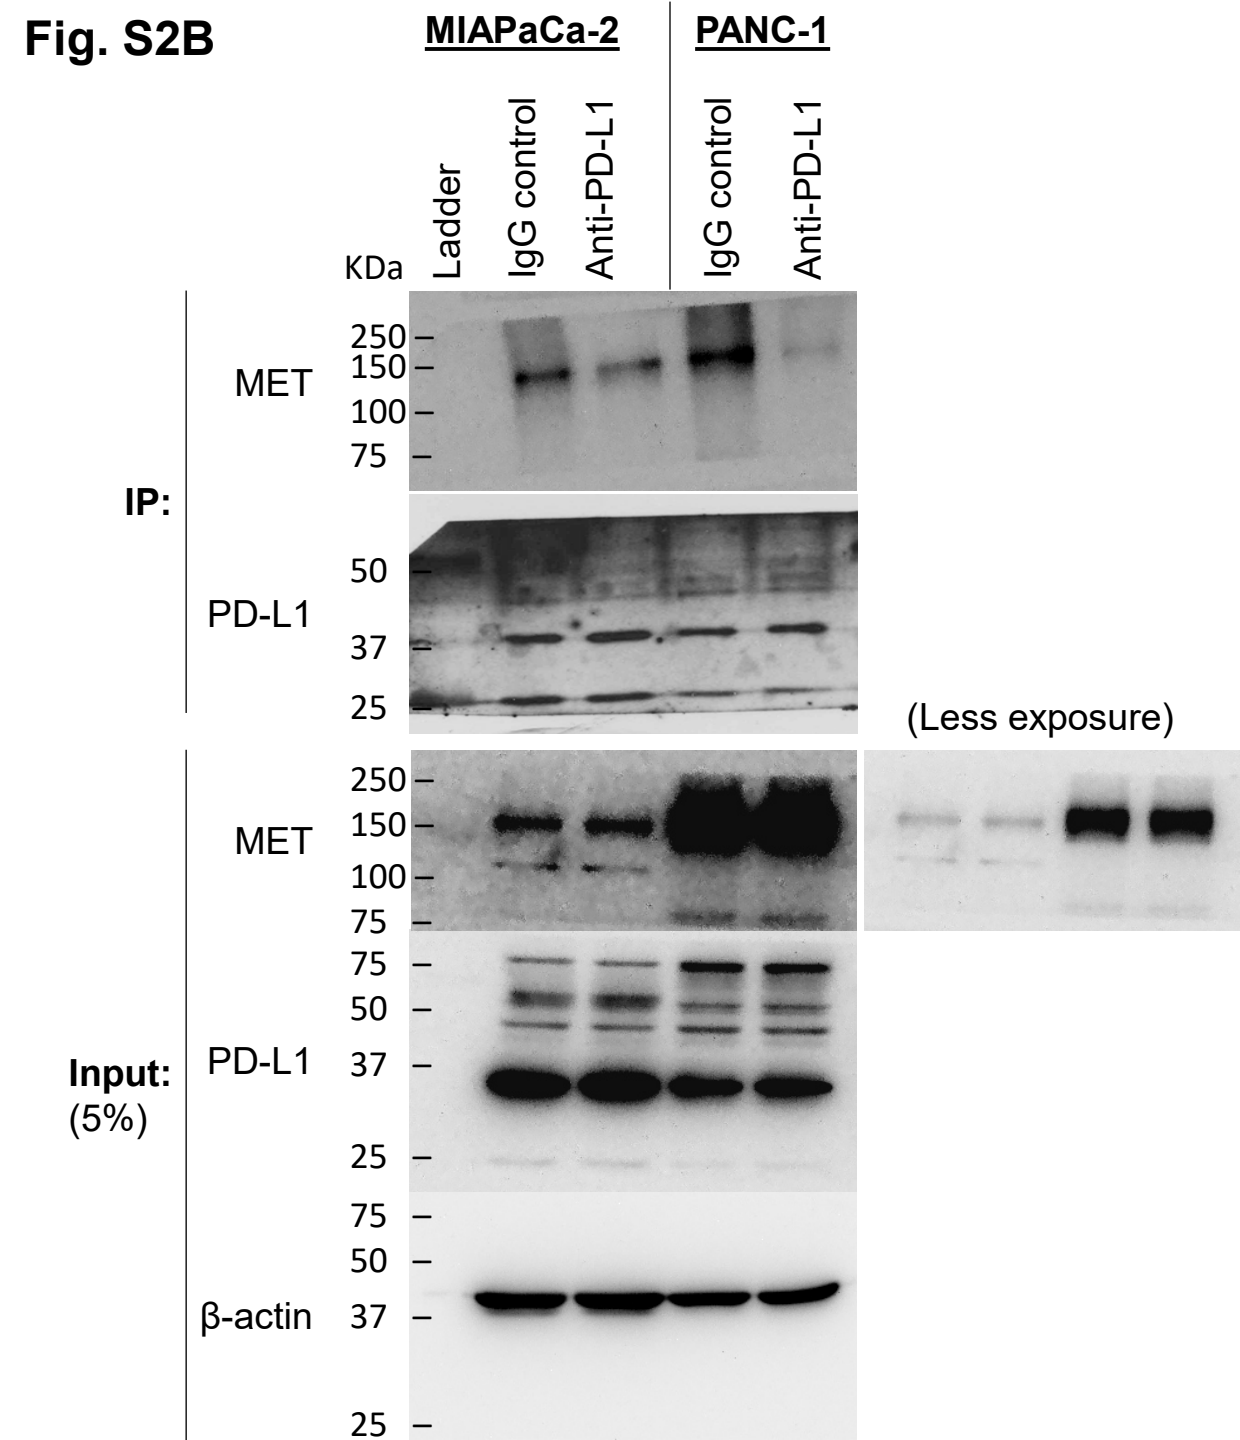

Supplement: s1 [file s1]
